# Supplementary material for: Preparation and structure–property relationship of flexible aramid films with enhanced strength by introducing asymmetric and symmetric aromatic ether bond structures
Source: Royal Society of Chemistry journal article supplement (doi:10.1039/d3py00525a), 2023-01-01
Supplement: d3py00525a1.pdf [file d3py00525a1.pdf]

## *Supporting information*

### **Preparation and structure-property relationship of flexible aramid films with enhanced strength by introducing asymmetric and symmetric aromatic ether bond structures**

Zheng Zhang<sup>1</sup>, Wenqin Hong<sup>1</sup>, Xiaoyan Wang<sup>1</sup>, Changhai Xu<sup>1</sup>, Yang Jiang<sup>1</sup>, Jinmei Du<sup>1, \*</sup>, Dagang  
Miao<sup>1</sup>, Guowei Xiao<sup>1</sup>

<sup>1</sup>College of Textile and Clothing, Qingdao University, Qingdao 266071, China

\*Corresponding author: J. Du (E-mail: jinmei\_du@qdu.edu.cn)

**Table 1S** Inherent viscosities of the polyamide.

| Samples      | MPDA: MAPB: PAPB | Inherent viscosity <sup>a</sup> (dL/g) |
|--------------|------------------|----------------------------------------|
| 0-PMIA       | 10: 0: 0         | 1.25                                   |
| MAPB10%-PMIA | 9: 1: 0          | 1.20                                   |
| MAPB20%-PMIA | 8: 2: 0          | 1.36                                   |
| MAPB30%-PMIA | 7: 3: 0          | 1.06                                   |
| PAPB10%-PMIA | 9: 0: 1          | 1.10                                   |
| PAPB20%-PMIA | 8: 0: 2          | 1.27                                   |
| PAPB30%-PMIA | 7: 0: 3          | 1.18                                   |

<sup>a</sup> Measured with a 0.5% (w/v) polyamide solution in sulfuric acid at 25 °C.

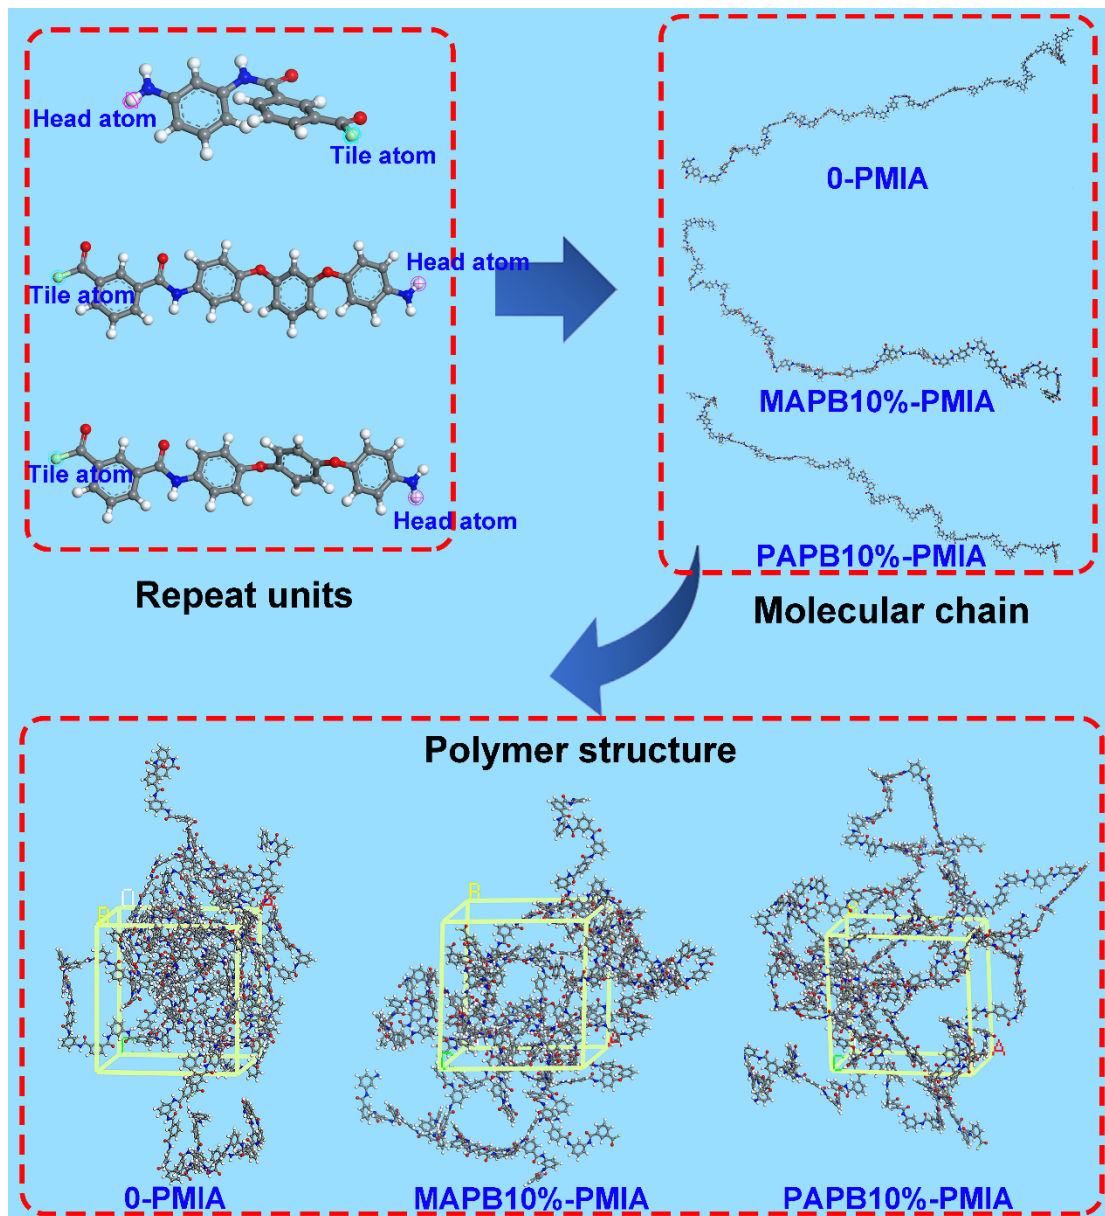

**Fig. S1.** Construction of polyamide models.

## Flame retardancy

The UL-94 vertical burning tests were performed on LFY- 601A vertical burning tester (Shandong Textile Institute) according to the ASTM D3801. The dimension of specimen was 125 mm × 13 mm × 3 mm.

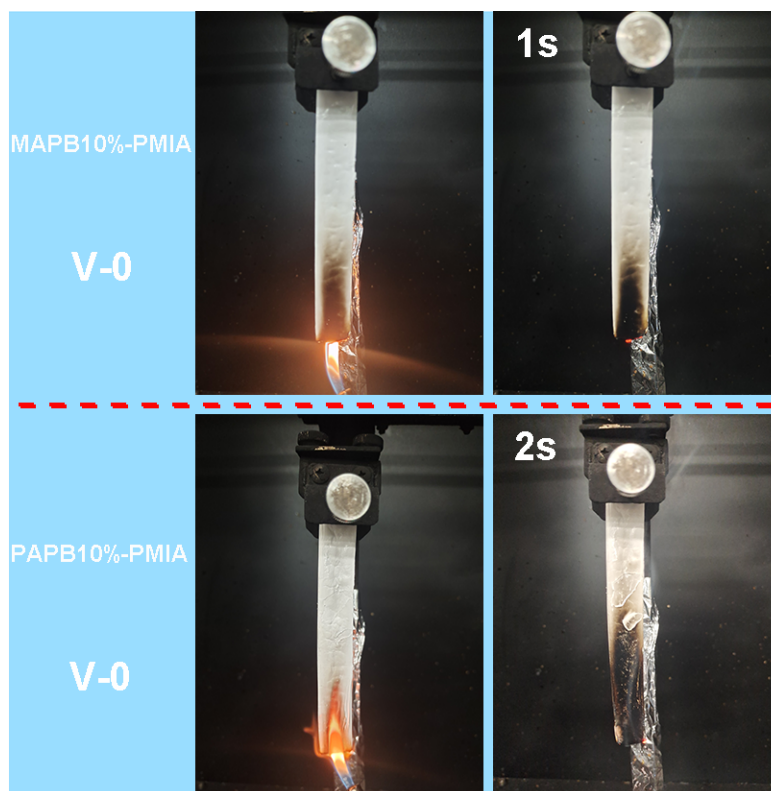

Fig. S2. Digital image of vertical combustion test.

## Solubility

**Table 2S.** Solubility of the 0-PMIA, MAPB10%-PMIA and PAPB10%-PMIA in different organic solvents.

| Polymer      | DMAC | DMF | NMP | THF | DMSO | CHCl <sub>3</sub> | m-cresol | DMAC-LiCl | DMF-LiCl |
|--------------|------|-----|-----|-----|------|-------------------|----------|-----------|----------|
| 0-PMIA       | ++   | +-  | ++  | --  | +-   | --                | --       | ++        | ++       |
| MAPB10%-PMIA | ++   | ++  | ++  | --  | ++   | --                | --       | ++        | ++       |
| PAPB10%-PMIA | ++   | ++  | ++  | --  | ++   | --                | --       | ++        | ++       |

For 10 mg of polymer sample in 1 mL of solvent at room temperature, ++: soluble; +-: partially soluble; --: insoluble.
